# Supplementary material for: On the absorption of the phenolatechromophore in the green fluorescent protein—role of individual interactions
Source: Royal Society of Chemistry journal article supplement (doi:10.1039/b920378h), 2009-11-25
Supplement: b920378h.pdf [file b920378h.pdf]

## **On the absorption of the phenolate chromophore in the Green Fluorescent Protein – Role of individual interactions**

Kasper Lincke,<sup>a</sup> Theis Sølling,<sup>a</sup> Lars H. Andersen,<sup>b</sup> Benedikte Klærke,<sup>b</sup> Dennis B. Rahbek,<sup>b</sup> Jyoti Rajput,<sup>b</sup> Christian Berg Oehlenschläger,<sup>a</sup> Michael Åxman Petersen<sup>a</sup> and Mogens Brøndsted Nielsen\*<sup>a</sup>

<sup>a</sup> *Department of Chemistry, University of Copenhagen, Universitetsparken 5, DK-2100, Copenhagen Ø, Denmark.*

*Fax: +45 35320212; Tel: +45 3532 0210; E-mail: mbn@kiku.dk*

<sup>b</sup> *Department of Physics and Astronomy, Aarhus University, Ny Munkegade, DK-8000, Aarhus C, Denmark.*

## **Supporting Information**

### **NMR Spectra of Compounds 3 and 6**

### **UV-Vis Absorption Spectra of Compound 3 in Methanol**

### $^1\text{H-NMR}$ (DMSO- $d_6$ , 300 MHz) of Compound 6

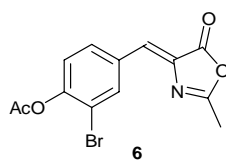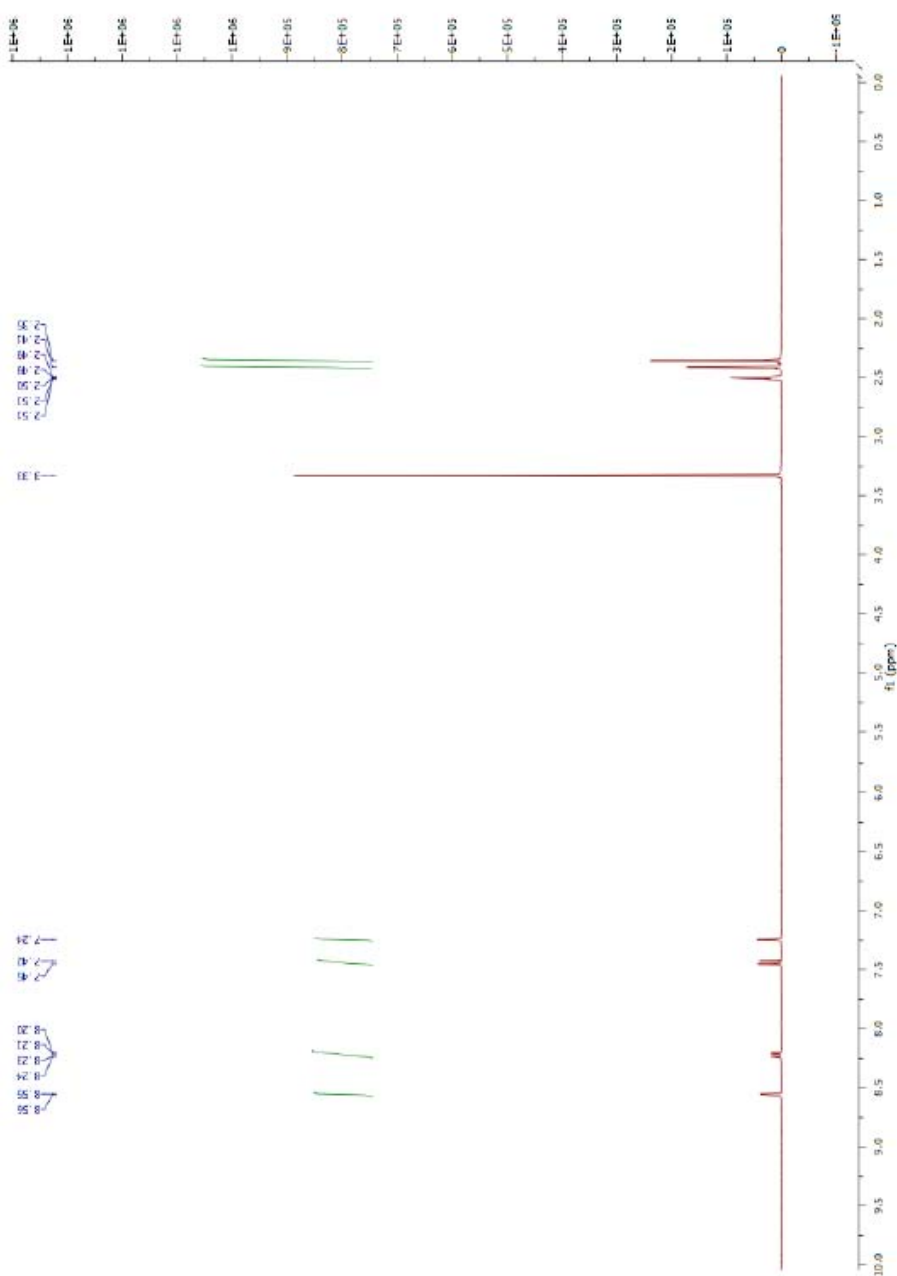

$^{13}\text{C}$ -NMR (DMSO- $d_6$ , 75 MHz) of Compound 6

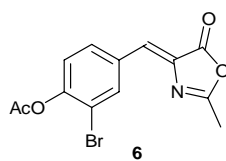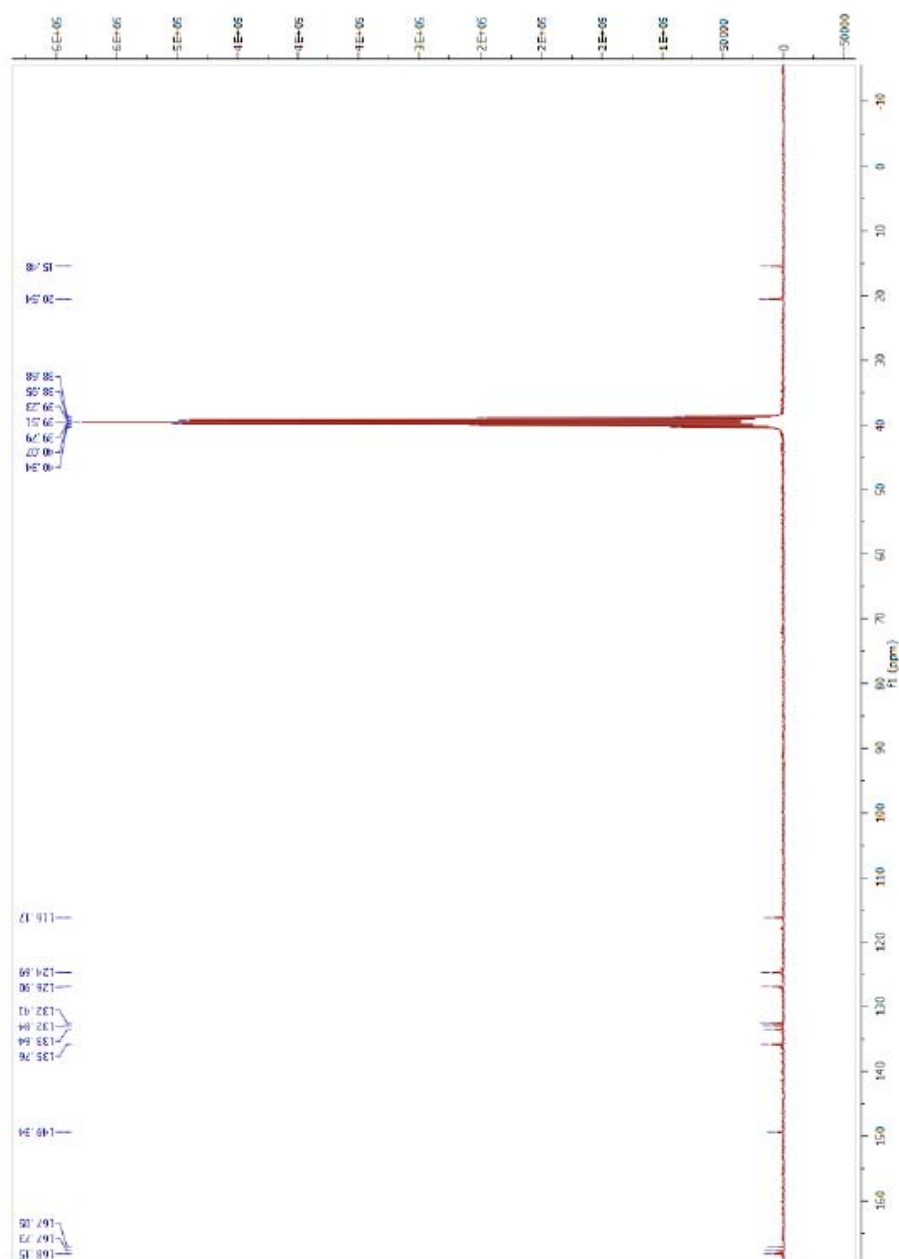



### $^{13}\text{C}$ -NMR (DMSO- $d_6$ , 75 MHz) of Compound 3

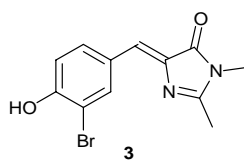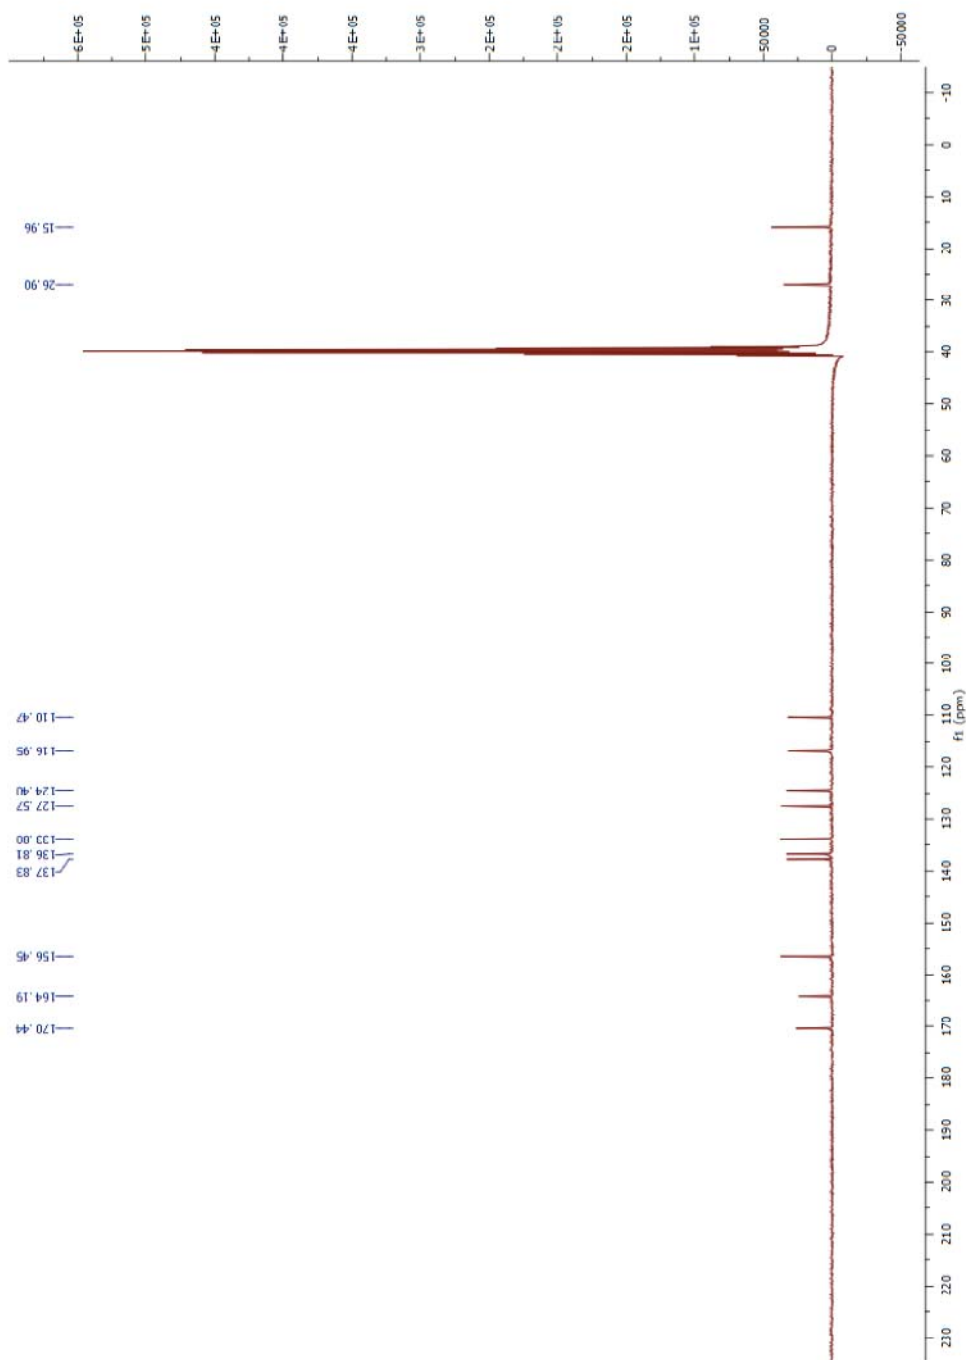

**UV-Vis Absorption Spectra of Compound 3 in MeOH**  
**(blue curve: neutral phenol; red curve: sodium phenolate)**

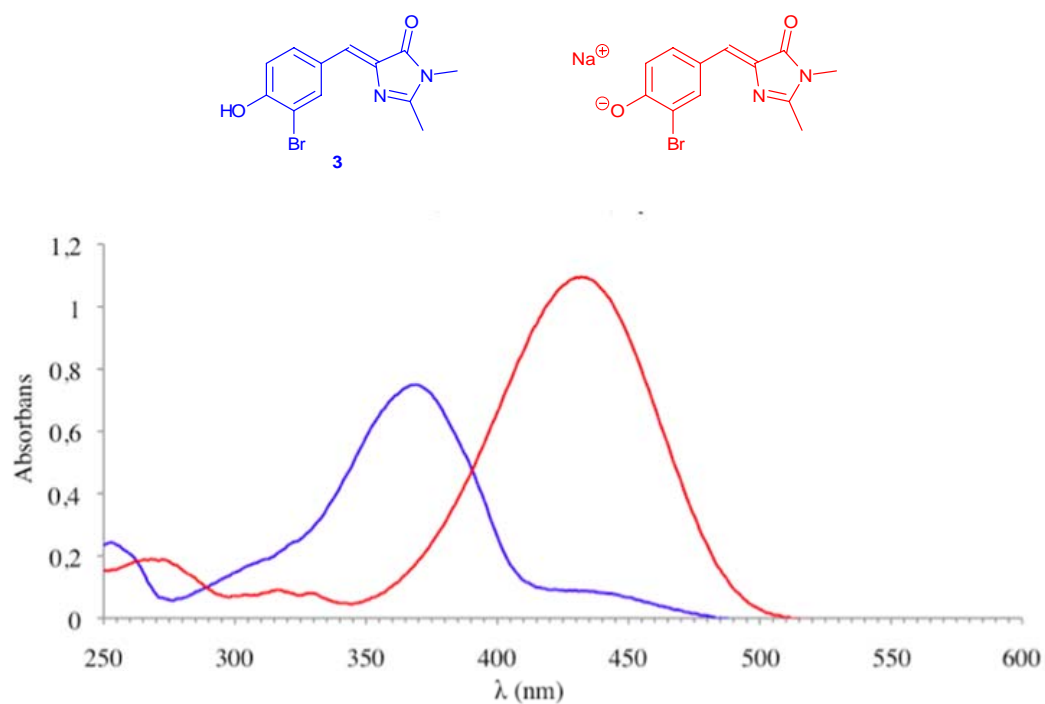

The phenolate was obtained by deprotonating the phenol with NaOMe.

The blue curve shows a shoulder corresponding to the presence of a small amount of phenolate (in equilibrium with the phenol in MeOH).
